# Supplementary material
Source: PubMed Central journal article supplement (PMC3024462)
Supplement: NIHMS261883-supplement-1_si_001.pdf [file NIHMS261883-supplement-1_si_001.pdf]

# Supporting Information

## Design and Synthesis of Potent HIV-1 Protease Inhibitors Incorporating Hexahydrofuropyranol- Derived High-Affinity P<sub>2</sub> Ligands: Structure- Activity Studies and Biological Evaluations .

*Arun K. Ghosh, Bruno D. Chapsal, Abigail Baldrige, Melinda P. Steffey, D.Eric Walters,  
Yasuhiro Koh, Masayuki Amano, and Hiroaki Mitsuya.*

### Table of Contents:

|                                                                                                               |    |
|---------------------------------------------------------------------------------------------------------------|----|
| Table 1. HPLC purity of inhibitors <b>35a-g</b> , <b>36</b> , and <b>37</b> .....                             | S2 |
| Table 2. High resolution mass spectrometry data for inhibitors <b>35a-g</b> , <b>36</b> , and <b>37</b> ..... | S3 |

### Analytical Purity

**Table 1.** Analytical purity of inhibitors **35a-g**, **36** and **37** determined by HPLC.

| Inhibitor  | Method A             |                 | Method B             |                 |
|------------|----------------------|-----------------|----------------------|-----------------|
|            | R <sub>t</sub> (min) | Purity (area %) | R <sub>t</sub> (min) | Purity (area %) |
| <b>35a</b> | 12.9                 | 98.2            | 15.8                 | 97.7            |
| <b>35b</b> | 12.8                 | 99.2            | 16.1                 | 98.1            |
| <b>35c</b> | 14.4                 | 95.2            | 17.6                 | 97.5            |
| <b>35d</b> | 15.4                 | 96.0            | 18.0                 | 98.0            |
| <b>35e</b> | 19.4                 | 99.5            | 20.4                 | 99.3            |
| <b>35f</b> | 12.4                 | 95.8            | 15.6                 | 95.6            |
| <b>35g</b> | 13.1                 | 97.2            | 16.0                 | 98.6            |
| <b>36</b>  | 10.6                 | 96.2            | 13.4                 | 97.9            |
| <b>37</b>  | 10.0                 | 97.1            | 13.8                 | 97.4            |

#### HPLC conditions:

**Method A** = Agilent Eclipse XDB-C18 (4.6 x 150 mm, 5  $\mu$ m); t = 0-1 min (MeCN:H<sub>2</sub>O:TFA 20:80:0.05), t = 1-20 min (*gradient to* MeCN:H<sub>2</sub>O:TFA 90:10:0.05), t = 20-25 min (MeCN:H<sub>2</sub>O:TFA 90:10:0.05); Flow = 1.5 mL/min; single detection wavelength  $\lambda$  = 215 nm, T = 25 °C, injection volume 30  $\mu$ L, 10 min equilibration time between run.

**Method B** = Agilent Eclipse XDB-C18 (4.6 x 150 mm, 5  $\mu$ m); t = 0-1 min (MeOH:H<sub>2</sub>O:TFA 25:75:0.05), t = 1-20 min (*gradient to* MeOH:H<sub>2</sub>O:TFA 95:5:0.05), t = 20-25 min (MeOH:H<sub>2</sub>O:TFA 95:5:0.05); Flow = 1.5 mL/min; single detection wavelength  $\lambda$  = 215 nm, T = 25 °C, injection volume 30  $\mu$ L, 10 min equilibration time between run.

**Table 2.** High resolution mass spectrometry data for inhibitors **35a-g**, **36** and **37**.

| <b>Inhibitor</b> | <b>Molecular Formula</b>                                        | <b>HRMS Technique</b> | <b>Ion</b>           | <b>Calculated</b> | <b>Found</b> |
|------------------|-----------------------------------------------------------------|-----------------------|----------------------|-------------------|--------------|
| <b>35a</b>       | C <sub>29</sub> H <sub>40</sub> N <sub>2</sub> O <sub>8</sub> S | ESI                   | [M+Na <sup>+</sup> ] | 599.2403          | 599.2406     |
| <b>35b</b>       | C <sub>29</sub> H <sub>40</sub> N <sub>2</sub> O <sub>8</sub> S | ESI                   | [M+Na <sup>+</sup> ] | 599.2403          | 599.2407     |
| <b>35c</b>       | C <sub>30</sub> H <sub>42</sub> N <sub>2</sub> O <sub>7</sub> S | ESI                   | [M+Na <sup>+</sup> ] | 597.2610          | 597.2621     |
| <b>35d</b>       | C <sub>30</sub> H <sub>42</sub> N <sub>2</sub> O <sub>7</sub> S | ESI                   | [M+Na <sup>+</sup> ] | 597.2610          | 597.2612     |
| <b>35e</b>       | C <sub>31</sub> H <sub>44</sub> N <sub>2</sub> O <sub>6</sub> S | ESI                   | [M+Na <sup>+</sup> ] | 595.2818          | 595.2816     |
| <b>35f</b>       | C <sub>29</sub> H <sub>40</sub> N <sub>2</sub> O <sub>8</sub> S | ESI                   | [M+Na <sup>+</sup> ] | 599.2403          | 599.2397     |
| <b>35g</b>       | C <sub>29</sub> H <sub>40</sub> N <sub>2</sub> O <sub>8</sub> S | ESI                   | [M+Na <sup>+</sup> ] | 599.2403          | 599.2397     |
| <b>36</b>        | C <sub>28</sub> H <sub>39</sub> N <sub>3</sub> O <sub>7</sub> S | ESI                   | [M+Na <sup>+</sup> ] | 584.2406          | 584.2402     |
| <b>37</b>        | C <sub>29</sub> H <sub>40</sub> N <sub>2</sub> O <sub>8</sub> S | ESI                   | [M+Na <sup>+</sup> ] | 599.2403          | 599.2414     |
